# Supplementary material
Source: publisher figshare collection journal article supplement (https://frontiersin.figshare.com/ndownloader/files/14064917)
Supplement: Supplementary file [file 14064917]

## Supplementary Material

### Origin of the mobile di-hydro-pterolate synthase gene determining sulfonamide resistance in clinical isolates

Miquel Sánchez-Osuna<sup>1</sup>, Pilar Cortés<sup>1</sup>, Jordi Barbé<sup>1\*</sup>, Ivan Erill<sup>2\*</sup>

\* **Correspondence:** Corresponding Authors: [jordi.barbe@uab.cat](mailto:jordi.barbe@uab.cat); [erill@umbc.edu](mailto:erill@umbc.edu)

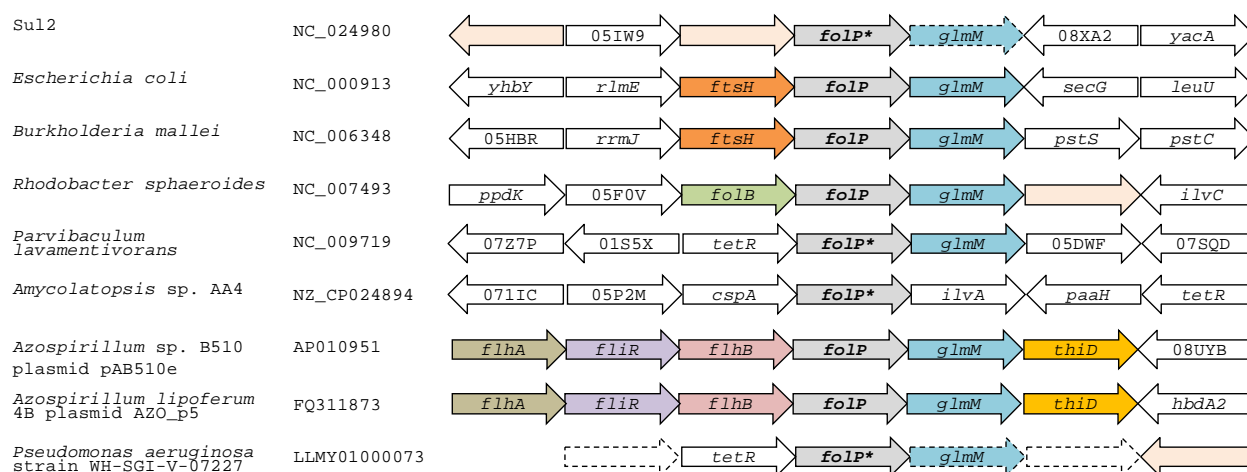

**Supplementary Data 7** – Schematic representation of the genetic environment of *sul2* genes, similar arrangements in chromosomally-encoded *folP* genes of the Gammaproteobacteria, Betaproteobacteria and Alphaproteobacteria, and arrangements in other putative mobilization instances of the *folP* gene. Arrow boxes indicate coding regions. When available, gene names or NOG identifiers are provided. Boxes for *folP* genes containing the two-amino acid insertion are designated as *folP\**.
